# Supplementary material
Source: publisher figshare collection journal article supplement (https://acs.figshare.com/ndownloader/files/10597561)
Supplement: Supplementary file 1 [file 10597561]

## Support information

# Nanocavity-in-Multiple Nanogap Plasmonic Coupling Effects from Vertically Sandwich-like Au@Al<sub>2</sub>O<sub>3</sub>@Au Arrays for Surface-Enhanced Raman Scattering

*Chen Yang,<sup>a</sup> Ying Chen,<sup>\*a</sup> Dan Liu,<sup>a</sup> Cheng Chen,<sup>a</sup> Jiemin Wang,<sup>a</sup> Ye Fan,<sup>a</sup> Shaoming Huang,<sup>b</sup> and  
Weiwei Lei<sup>\*a</sup>*

<sup>a</sup>Institute for Frontier Materials, Deakin University, Locked Bag 2000, Geelong, Victoria 3220,  
Australia.

<sup>b</sup>Nanomaterials & Chemistry Key Laboratory, Wenzhou University, Wenzhou, P. R. China.

\* E-mail of corresponding authors: [ian.chen@deakin.edu.au](mailto:ian.chen@deakin.edu.au) ; [weiwei.lei@deakin.edu.au](mailto:weiwei.lei@deakin.edu.au)

## 1. Chemical component analysis

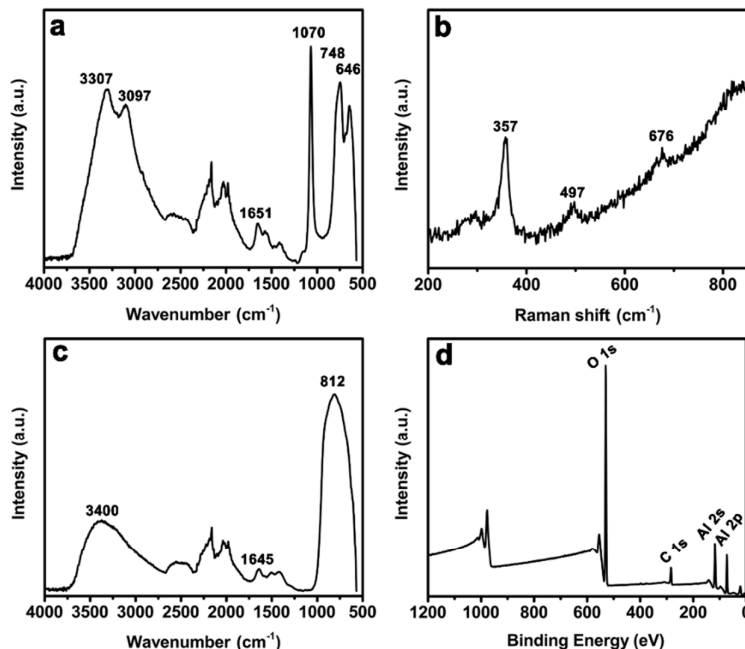

**Figure S-1.** (a) FT-IR (ATR) spectroscopy and (b) Raman spectra of boehmite NSs; (c) FT-IR (ATR) spectroscopy and (d) XPS analysis of Al<sub>2</sub>O<sub>3</sub> NSs.

Figure S1a illustrated that the characteristic peaks of boehmite NSs in FT-IR (ATR) spectroscopy were located at 3307, 3097, 1651, 1070, 748 and 646 cm<sup>-1</sup>.<sup>1-3</sup> The peaks at 3307 and 1652 cm<sup>-1</sup> belonged to the stretching vibration of -OH group and the bending mode in the absorbed water, respectively. The peak at 3097 cm<sup>-1</sup> discharged from the symmetric stretching vibration of AlO-H. The intense peak at 1070 cm<sup>-1</sup> ascribed to the bending vibration mode of Al-O-H and bands at 748 and 646 cm<sup>-1</sup> consisted with the vibration mode of AlO<sub>6</sub>. The Raman spectra in Figure S1b further proved the existence of boehmite NSs including the bands at 357, 497 and 676 cm<sup>-1</sup>.<sup>4</sup>

As showed in Figure S1c, the peaks at 3402, 1645 and 812 cm<sup>-1</sup> were identified after the RTA process. The peaks at 3402 and 1645 cm<sup>-1</sup> were from -OH groups of the adsorbed water, while the peak at 812 cm<sup>-1</sup> were classified into AlO<sub>6</sub>.<sup>5</sup> Compared with Figure S1a, it found that the strong peak

of  $3097\text{ cm}^{-1}$  (the symmetric stretching vibration of AlO-H) and  $1070\text{ cm}^{-1}$  (the bending vibration mode of Al-O-H in boehmite) disappeared obviously. Therefore, it demonstrated that the dehydration reaction of boehmite NSs occurred during the RTA process. In addition, by the XPS analysis of  $\text{Al}_2\text{O}_3$  NSs in Figure S1d, two peaks located at 74.1 eV and 118.9 eV were assigned to Al 2p and Al 2s, respectively. The peak of 531 eV was consistent with O 1s in  $\text{Al}_2\text{O}_3$  NSs, while 284.8 eV was from C 2s.<sup>6-7</sup> The atomic ratio of Al:O was closely around 2:3. Thus, the XPS tests further confirmed the chemical components of  $\text{Al}_2\text{O}_3$  NSs. According to the analysis above, we suggested that the formation of  $\text{Al}_2\text{O}_3$  NSs could be explained as following steps: firstly, Al reacted with  $\text{H}_2\text{O}$  at  $120\text{ }^\circ\text{C}$  to synthesize boehmite NSs on the surface of Al foil; secondly, the large scale of vertical morphology might be due to physically attack of dihydrogen and air bubbles between the interface of  $\text{H}_2\text{O}/\text{DMF}$  and Al foil; finally, boehmite NSs dehydrated into generate  $\text{Al}_2\text{O}_3$  NSs after RTA process.<sup>8-9</sup>

## 2. Morphologies of $\text{Al}_2\text{O}_3$ NSs and sandwich-like $\text{Au@Al}_2\text{O}_3\text{@Au}$ hybrids

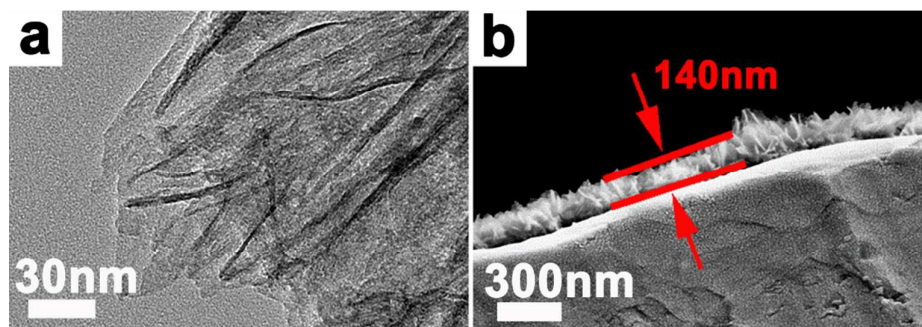

**Figure S-2.** (a) TEM image of  $\text{Al}_2\text{O}_3$  NSs and (b) side-view SEM image of vertical  $\text{Al}_2\text{O}_3$  NSs arrays

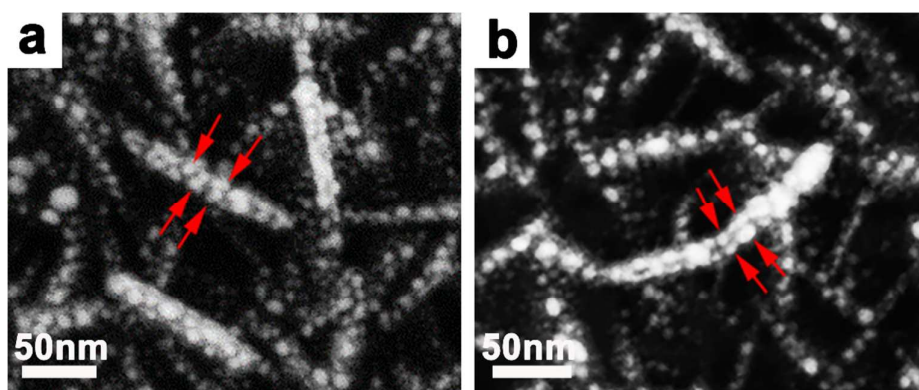

**Figure S-3.** (a) and (b) Higher magnification SEM images of sandwich-like Au@  $\text{Al}_2\text{O}_3$ @Au hybrid nanosheets.

### 3. AFM test of $\text{Al}_2\text{O}_3$ NSs and contact angle performance of PSHNs substrates

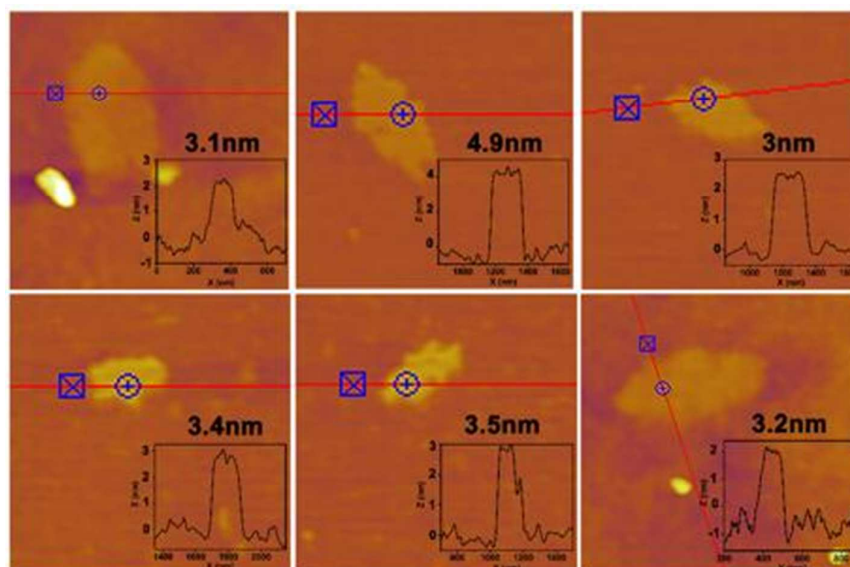

**Figure S-4.** AFM images of  $\text{Al}_2\text{O}_3$  NSs on Si substrate.

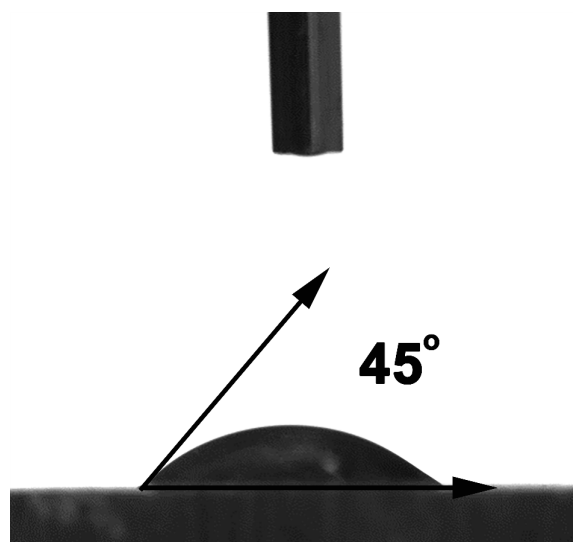

**Figure S-5.** Contact angle test of 2DT-PSHNs substrate.

#### 4. Analysis of Raman signals

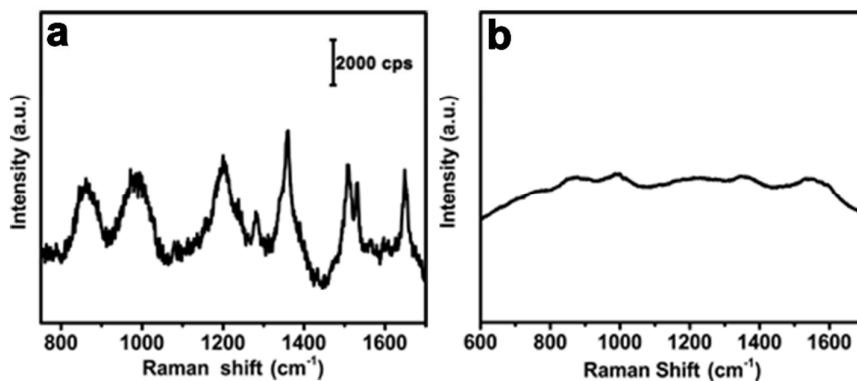

**Figure S-6.** Raman spectroscopy: (a) original spectral line from Al foil as the non-enhanced substrate; (b) as-used and washed 2DT-PSHNs substrate.

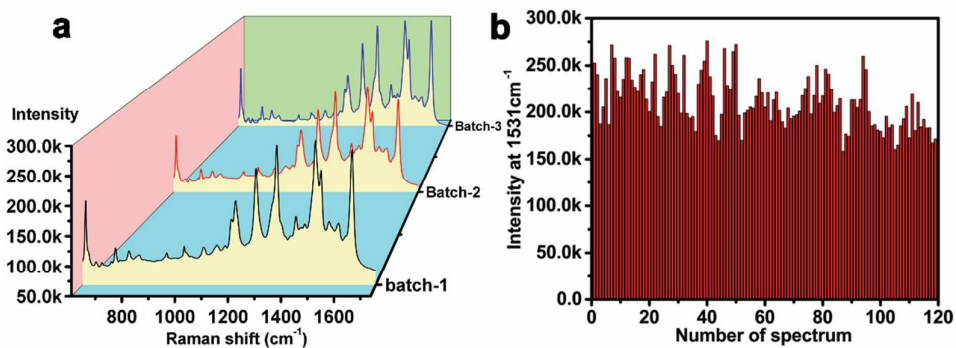

**Figure S-7.** (a) batch-to-batch and (b) point-to-point SERS reproducibility of 2DT-PSHNs substrates.

**Table S-1.** Estimation of Raman Enhanced Factors of  $2.14 \times 10^{-16}$ M and  $10^{-18}$ M Rh B solution on 1DT-, 2DT- and 3DT-PSHNs substrates.

| Sample<br>( 3D PSHNs substrates) | Raman shift<br>(996~1000 $\text{cm}^{-1}$ ) | Raman shift<br>(1527~1532 $\text{cm}^{-1}$ ) |
|----------------------------------|---------------------------------------------|----------------------------------------------|
| 1DT-EF <sub>-16M</sub>           | $0.16 \times 10^{10}$                       | $0.22 \times 10^{10}$                        |
| 2DT-EF <sub>-16M</sub>           | $1.47 \times 10^{10}$                       | $2.98 \times 10^{10}$                        |
| 3DT-EF <sub>-16M</sub>           | $0.62 \times 10^{10}$                       | $0.49 \times 10^{10}$                        |
| 1DT-EF <sub>-18M</sub>           | none                                        | $0.20 \times 10^{12}$                        |
| 2DT- EF <sub>-18M</sub>          | $0.36 \times 10^{12}$                       | $1.27 \times 10^{12}$                        |
| 2DT-C2-EF <sub>-18M</sub>        | $0.43 \times 10^{12}$                       | $1.09 \times 10^{12}$                        |
| 2DT-C3-EF <sub>-18M</sub>        | $0.71 \times 10^{12}$                       | $1.30 \times 10^{12}$                        |
| 2DT-C4-EF <sub>-18M</sub>        | $0.90 \times 10^{12}$                       | $0.80 \times 10^{12}$                        |
| 2DT-C5-EF <sub>-18M</sub>        | $0.36 \times 10^{12}$                       | $1.20 \times 10^{12}$                        |
| 3DT-EF <sub>-18M</sub>           | $0.46 \times 10^{12}$                       | none                                         |

## References

- (1) Shi, Z. B.; Jiao, W. Q.; Chen, L.; Wu, P.; Wang, Y. M.; He, M. Y., Clean Synthesis of Hierarchically Structured Boehmite and Gamma-Alumina with a Flower-Like Morphology. *Micropor. Mesopor. Mat.* **2016**, 224, 253-261.
- (2) Cai, Y.; Huang, H. H.; Wang, L.; Zhang, X. J.; Yuan, Y. W.; Li, R.; Wan, H.; Guan, G. F., Facile Synthesis of Pure Phase Gamma-AlOOH and Gamma-Al<sub>2</sub>O<sub>3</sub> Nanofibers in a Recoverable Ionic Liquid via a Low Temperature Route. *RSC Adv.* **2015**, 5 (127), 104884-104890.
- (3) Yang, J. X.; Ma, J. J.; Huang, Y. W., Hydrothermal Synthesis of Monodisperse Leaf-Like Boehmite Nanosheets: Transformation from Irregular to Regular Morphology. *Frontier of Nanoscience and Technology* **2011**, 694, 28-32.

- (4) Wang, Z. J.; Tian, Y.; Fan, H. S.; Gong, J. H.; Yang, S. G.; Ma, J. H.; Xu, J., Facile Seed-Assisted Hydrothermal Fabrication of Gamma-AlOOH Nanoflake Films with Superhydrophobicity. *New J Chem.* **2014**, 38 (3), 1321-1327.
- (5) Liu, S. L.; Chen, C. Y.; Liu, Q. P.; Zhuo, Y. W.; Yuan, D.; Dai, Z. H.; Bao, J. C., Two-Dimensional Porous Gamma-AlOOH and Gamma-Al<sub>2</sub>O<sub>3</sub> Nanosheets: Hydrothermal Synthesis, Formation Mechanism and Catalytic Performance. *RSC Adv.* **2015**, 5 (88), 71728-71734.
- (6) Iatsunskyi, I.; Kempinski, M.; Jancelewicz, M.; Załęski, K.; Jurga, S.; Smyntyna, V., Structural and XPS Characterization of ALD Al<sub>2</sub>O<sub>3</sub> Coated Porous Silicon. *Vacuum* **2015**, 113, 52-58.
- (7) Jankovský, O.; Šimek, P.; Sedmidubský, D.; Huber, Š.; Pumera, M.; Sofer, Z., Towards Highly Electrically Conductive and Thermally Insulating Graphene Nanocomposites: Al<sub>2</sub>O<sub>3</sub>-Graphene. *RSC Adv.* **2013**, 4 (15), 7418-7424.
- (8). Yamazoe, S.; Naya, M.; Shiota, M.; Morikawa, T.; Kubo, A.; Tani, T.; Hishiki, T.; Horiuchi, T.; Suematsu, M.; Kajimura, M., Large-Area Surface-Enhanced Raman Spectroscopy Imaging of Brain Ischemia by Gold Nanoparticles Grown on Random Nanoarrays of Transparent Boehmite. *ACS Nano* **2014**, 8 (6), 5622-5632.
- (9). Peng, S.; Yang, X.; Tian, D.; Deng, W., Chemically Stable and Mechanically Durable Superamphiphobic Aluminum Surface with a Micro/Nanoscale Binary Structure. *ACS Appl. Mater. Inter.* **2014**, 6 (17), 15188-15197.
